# Supplementary material for: New Azaphilones from Nigrospora oryzae Co-Cultured with Beauveria bassiana
Source: PubMed Central journal article supplement (PMC6100547; doi:10.3390/molecules23071816), 2018-07-21
Supplement: molecules-23-01816-s001.pdf [file molecules-23-01816-s001.pdf]

## Supplementary Materials

# New Azaphilones from *Nigrospora oryzae* Co-Cultured with *Beauveria bassiana*

Zhuo-Xi Zhang<sup>1</sup>, Xue-Qiong Yang<sup>1</sup>, Qing-Yan Zhou, Bang-Yan Wang, Ming Hu,  
Ya-Bin Yang\*, Hao Zhou, and Zhong-Tao Ding\*

*Functional Molecules Analysis and Biotransformation Key Laboratory of Universities  
in Yunnan Province, School of Chemical Science and Technology, Yunnan University,  
2st Cuihu North Road, Kunming 650091, China;*

Corresponding authors:

Doctor Ya-Bin Yang, School of Chemical Science and Technology, Yunnan  
University, Kunming 650091, China. E-mail: ybyang@ynu.edu.cn

Professor Zhong-Tao Ding, School of Chemical Science and Technology, Yunnan  
University, Kunming 650091, China. E-mail: ztding@ynu.edu.cn

<sup>1</sup>These authors contributed equally to this work.

## Table of contents

|                                                                                                                                       |    |
|---------------------------------------------------------------------------------------------------------------------------------------|----|
| Figure S1. HRESIMS spectrum of compound <b>1</b>                                                                                      | 3  |
| Figure S2. <sup>1</sup> H NMR spectrum of compound <b>1</b> in CDCl <sub>3</sub> (500 MHz)                                            | 3  |
| Figure S3. <sup>13</sup> C NMR spectrum of compound <b>1</b> in CDCl <sub>3</sub> (125MHz)                                            | 4  |
| Figure S4. COSY spectrum of compound <b>1</b> in CDCl <sub>3</sub> (500 MHz)                                                          | 4  |
| Figure S5. HSQC spectrum of compound <b>1</b> in CDCl <sub>3</sub> (500 MHz)                                                          | 5  |
| Figure S6. HMBC spectrum of compound <b>1</b> in CDCl <sub>3</sub> (500 MHz)                                                          | 5  |
| Figure S7. NOESY spectrum of compound <b>1</b> in CDCl <sub>3</sub> (500 MHz)                                                         | 6  |
| Figure S8. HRESIMS spectrum of compound <b>2</b>                                                                                      | 6  |
| Figure S9. <sup>1</sup> H NMR spectrum of compound <b>2</b> in acetone (600 MHz)                                                      | 7  |
| Figure S10. <sup>13</sup> C NMR spectrum of compound <b>2</b> in acetone (150MHz)                                                     | 7  |
| Figure S11. COSY spectrum of compound <b>2</b> in acetone (600MHz)                                                                    | 8  |
| Figure S12. HSQC spectrum of compound <b>2</b> in acetone (600MHz)                                                                    | 8  |
| Figure S13. HMBC spectrum of compound <b>2</b> in acetone (600MHz)                                                                    | 9  |
| Figure S14. NOESY spectrum of compound <b>2</b> in acetone (600MHz)                                                                   | 9  |
| Figure S15.HRESIMS spectrum of compounds <b>3</b> and <b>4</b>                                                                        | 10 |
| Figure S16. <sup>1</sup> H NMR spectrum of compounds <b>3</b> and <b>4</b> in MeOD (500 MHz)                                          | 10 |
| Figure S17. <sup>13</sup> C NMR spectrum of compounds <b>3</b> and <b>4</b> in MeOD (125 MHz)                                         | 11 |
| Figure S18. COSY spectrum of compounds <b>3</b> and <b>4</b> in MeOD (500MHz)                                                         | 11 |
| Figure S19. HSQC spectrum of compounds <b>3</b> and <b>4</b> in MeOD (500MHz)                                                         | 12 |
| Figure S20. HMBC spectrum of compounds <b>3</b> and <b>4</b> in MeOD (500MHz)                                                         | 12 |
| Figure S21. NOESY spectrum of compounds <b>3</b> and <b>4</b> in MeOD (500MHz)                                                        | 13 |
| Figure S22.HRESIMS spectrum of compound <b>5</b>                                                                                      | 13 |
| Figure S23. <sup>1</sup> H NMR spectrum of compound <b>5</b> in MeOD (600 MHz)                                                        | 14 |
| Figure S24. <sup>13</sup> C NMR spectrum of compound <b>5</b> in MeOD (150MHz)                                                        | 14 |
| Figure S25. COSY spectrum of compound <b>5</b> in MeOD (600MHz)                                                                       | 15 |
| Figure S26. HSQC spectrum of compound <b>5</b> in MeOD (600MHz)                                                                       | 15 |
| Figure S27. HMBC spectrum of compound <b>5</b> in MeOD (600MHz)                                                                       | 16 |
| Figure S28.NOESY spectrum of compound <b>5</b> in MeOD (600MHz)                                                                       | 16 |
| Figure S29. CD spectrum of compound <b>1</b>                                                                                          | 17 |
| Figure S30.CD spectrum of compounds <b>2</b>                                                                                          | 17 |
| Figure S31.CD spectrum of compounds <b>5</b>                                                                                          | 18 |
| Figure S32. The plate culture of <i>Beauveria bassiana</i> , and <i>Nigrospora oryzae</i> in 3 days (Sequenced as the left to right). | 18 |

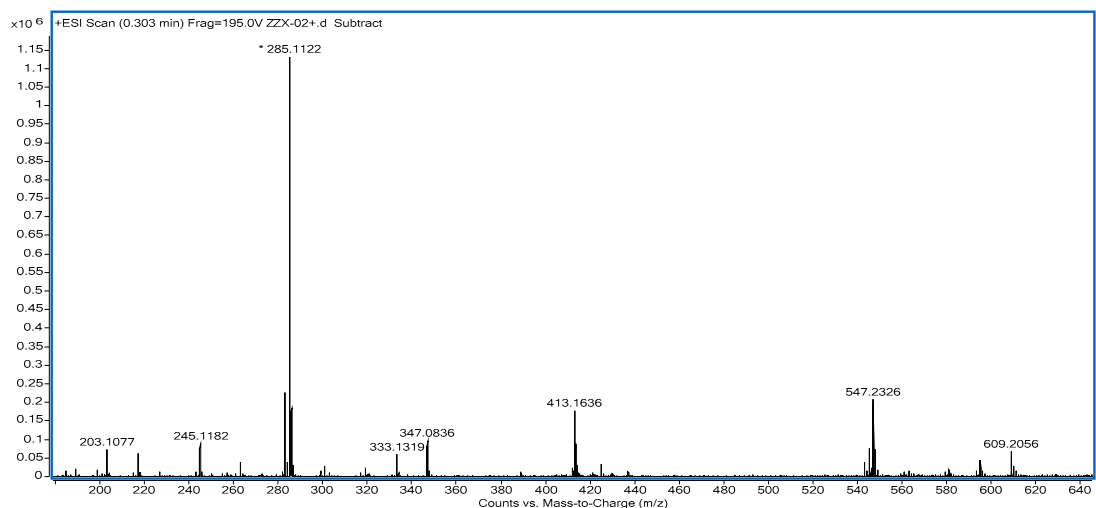

Figure S1. HRESIMS spectrum of compound **1**

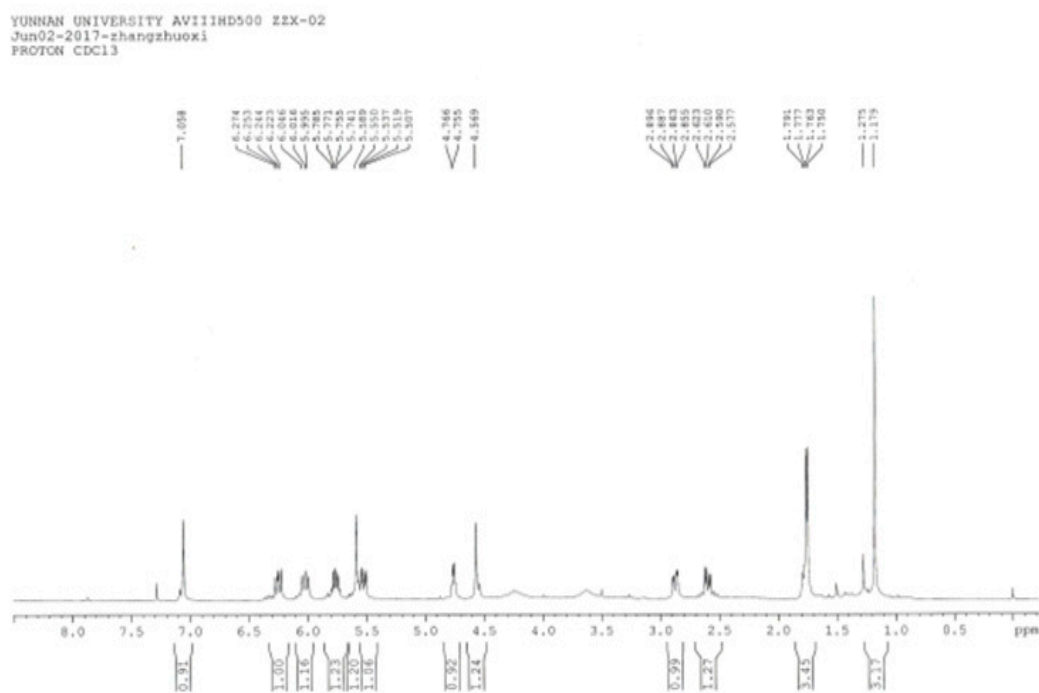

Figure S2. <sup>1</sup>H NMR spectrum of compound **1** in CDCl<sub>3</sub> (500 MHz)

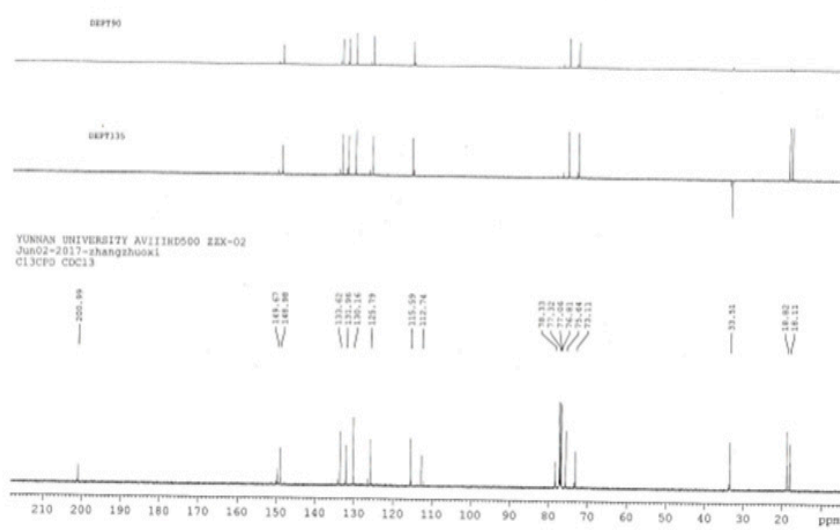

Figure S3.  $^{13}\text{C}$  NMR spectrum of compound **1** in  $\text{CDCl}_3$  (125MHz)

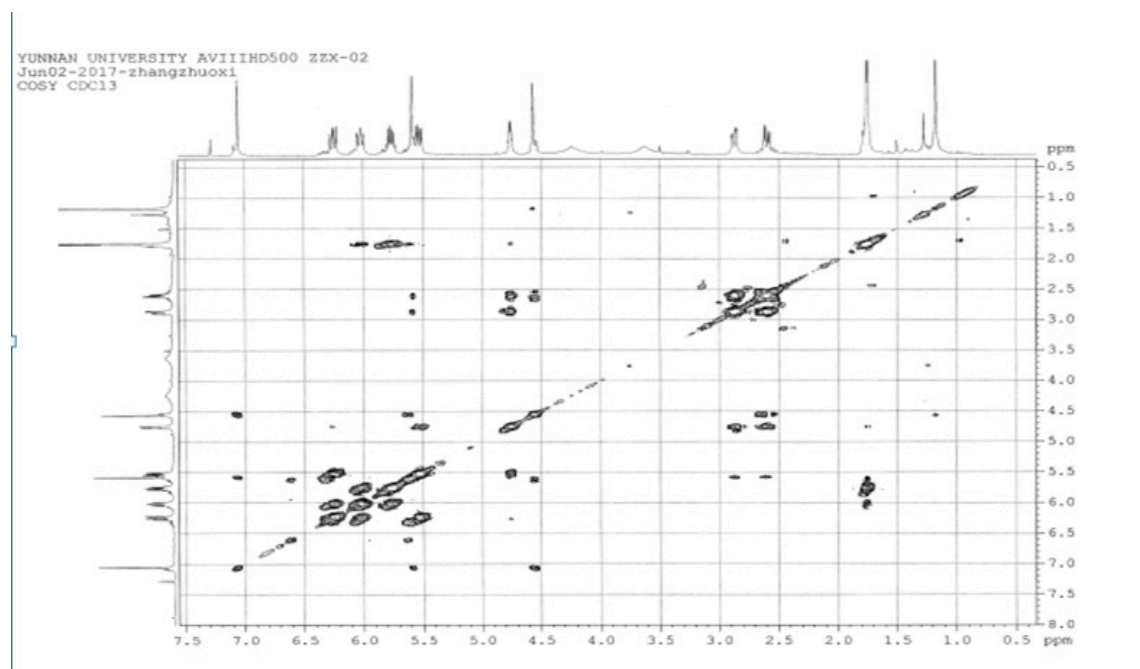

Figure S4. COSY spectrum of compound **1** in  $\text{CDCl}_3$  (500 MHz)

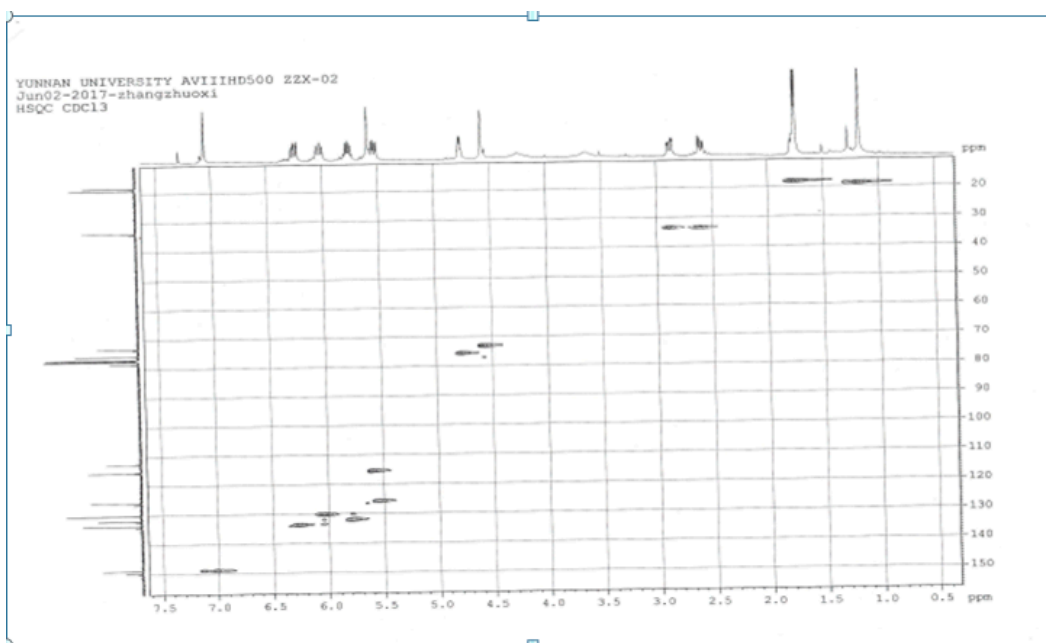

Figure S5. HSQC spectrum of compound **1** in CDCl<sub>3</sub> (500 MHz)

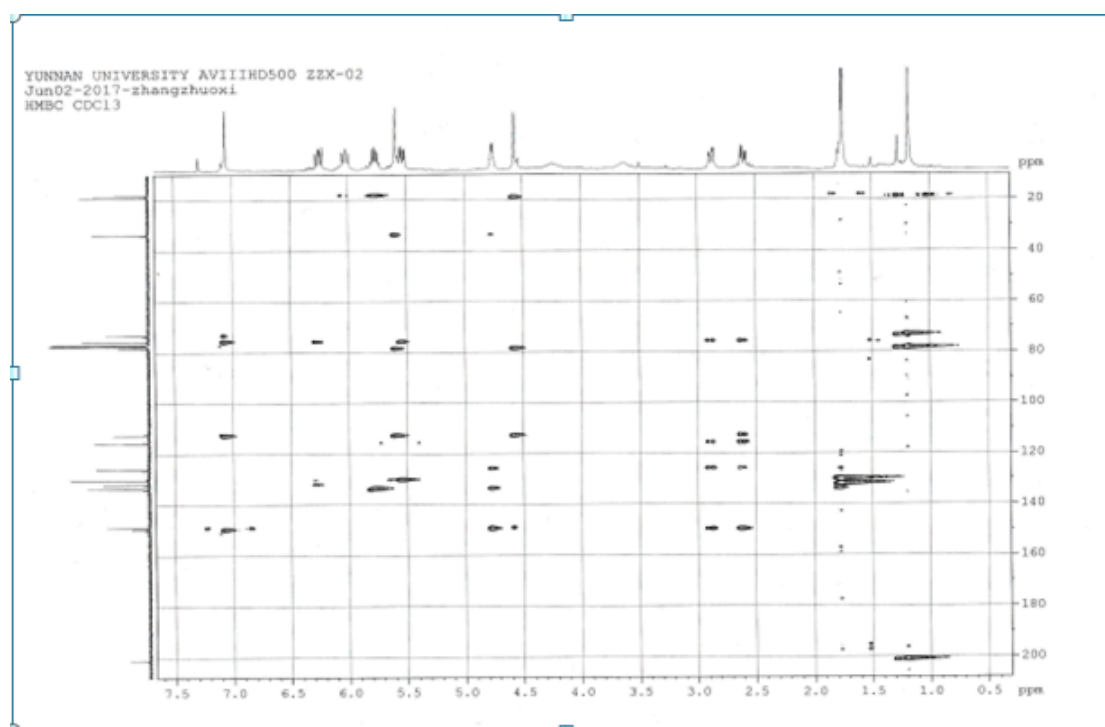

Figure S6. HMBC spectrum of compound **1** in CDCl<sub>3</sub> (500 MHz)

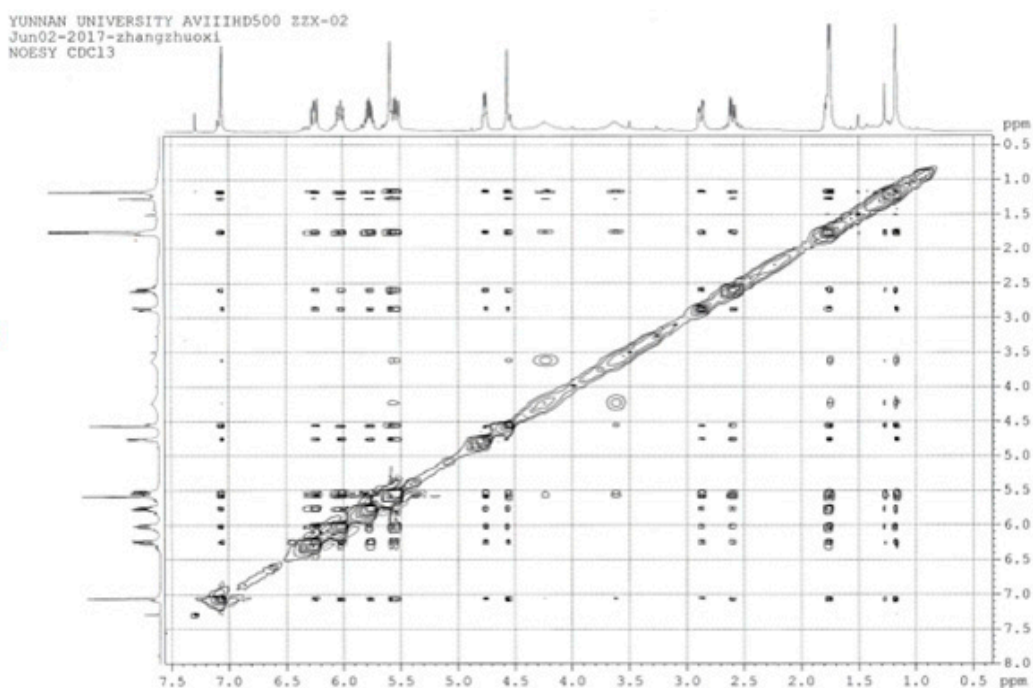

Figure S7. NOESY spectrum of compound **1** in CDCl<sub>3</sub> (500 MHz)

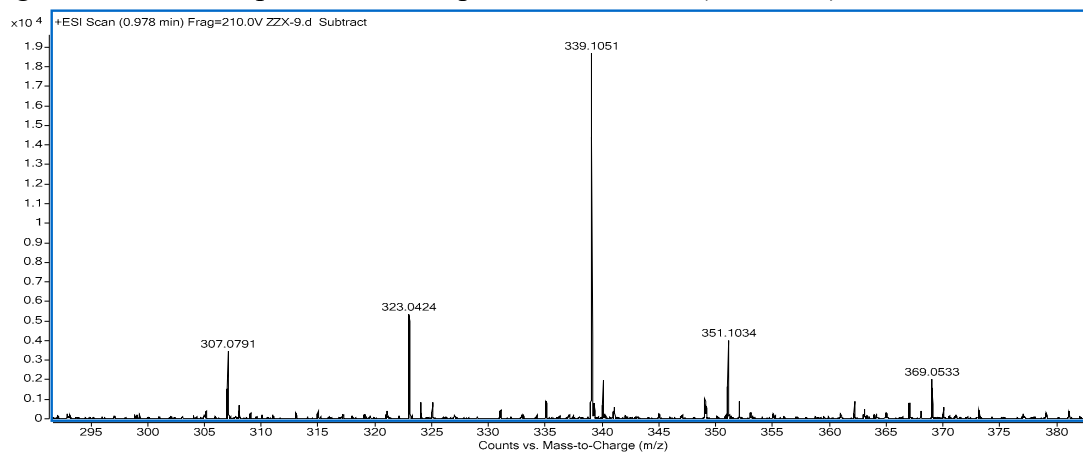

Figure S8. HRESIMS spectrum of compound **2**

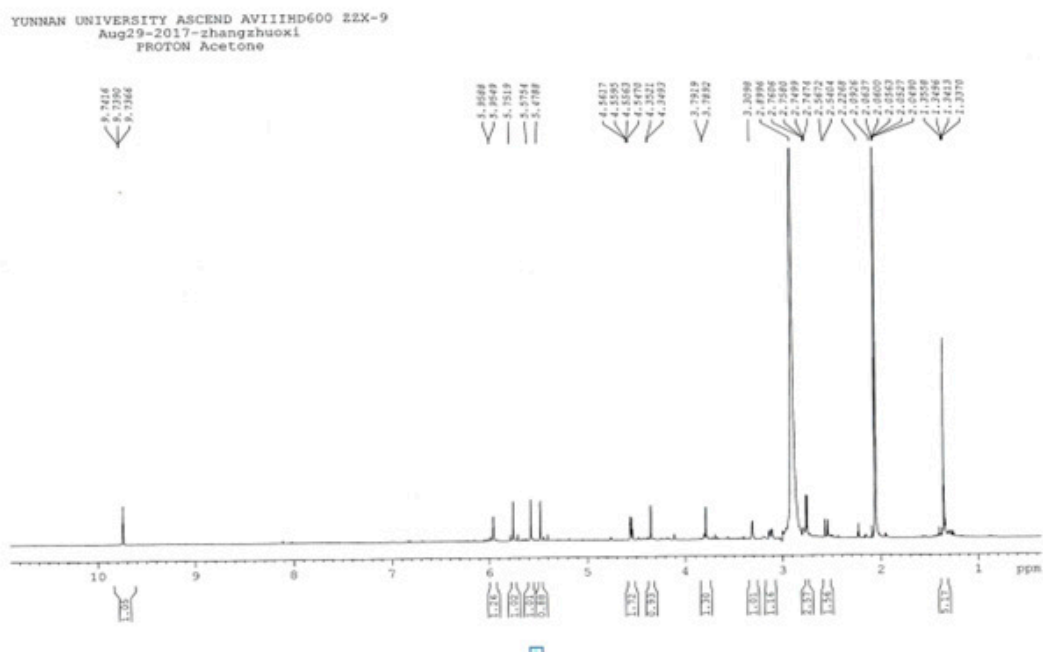

Figure S9.  $^1\text{H}$  NMR spectrum of compound **2** in acetone (600 MHz)

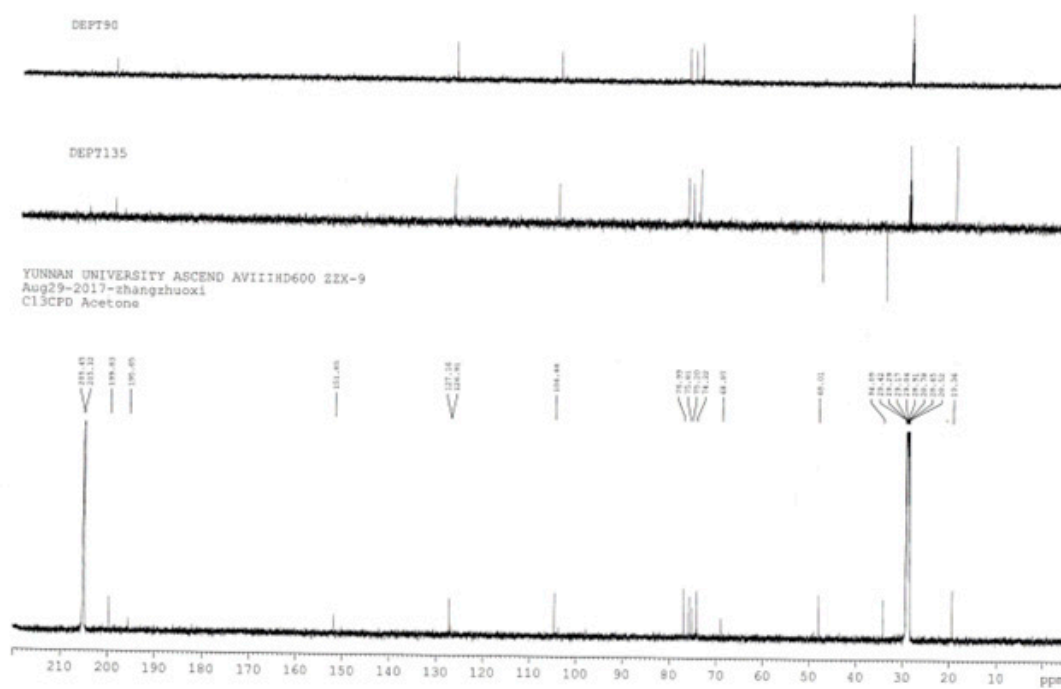

Figure S10.  $^{13}\text{C}$  NMR spectrum of compound **2** in acetone (150MHz)

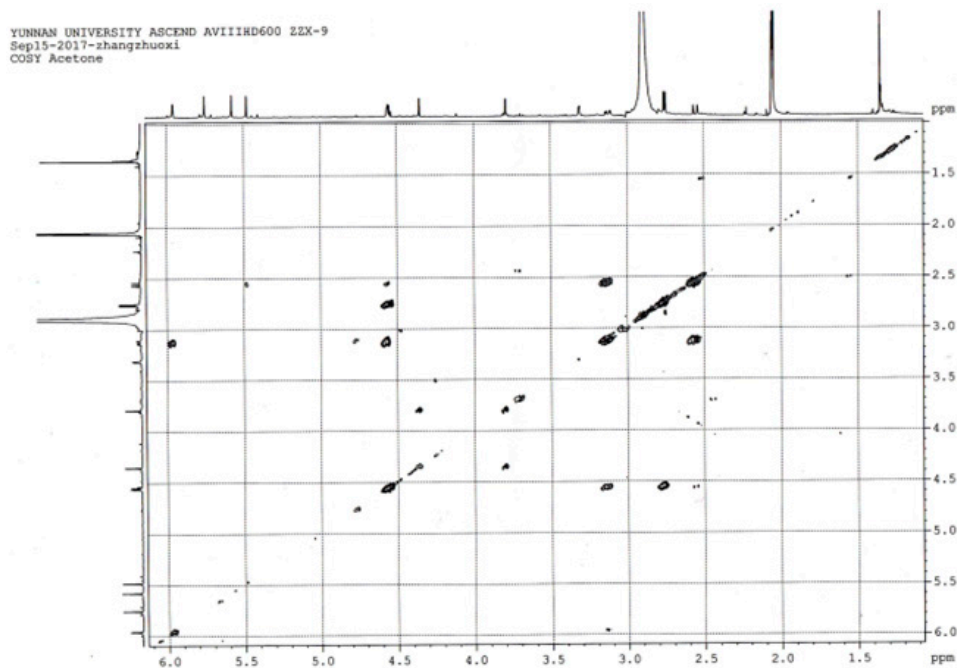

Figure S11. COSY spectrum of compound **2** in acetone (600MHz)

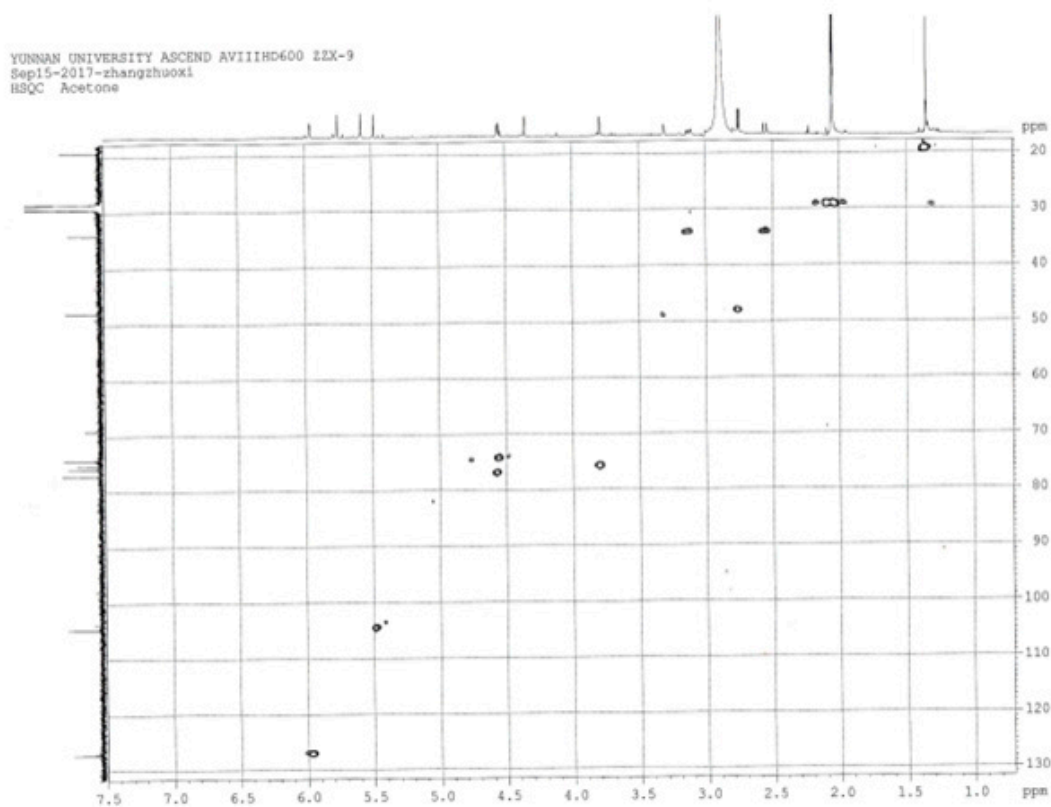

Figure S12. HSQC spectrum of compound **2** in acetone (600MHz)



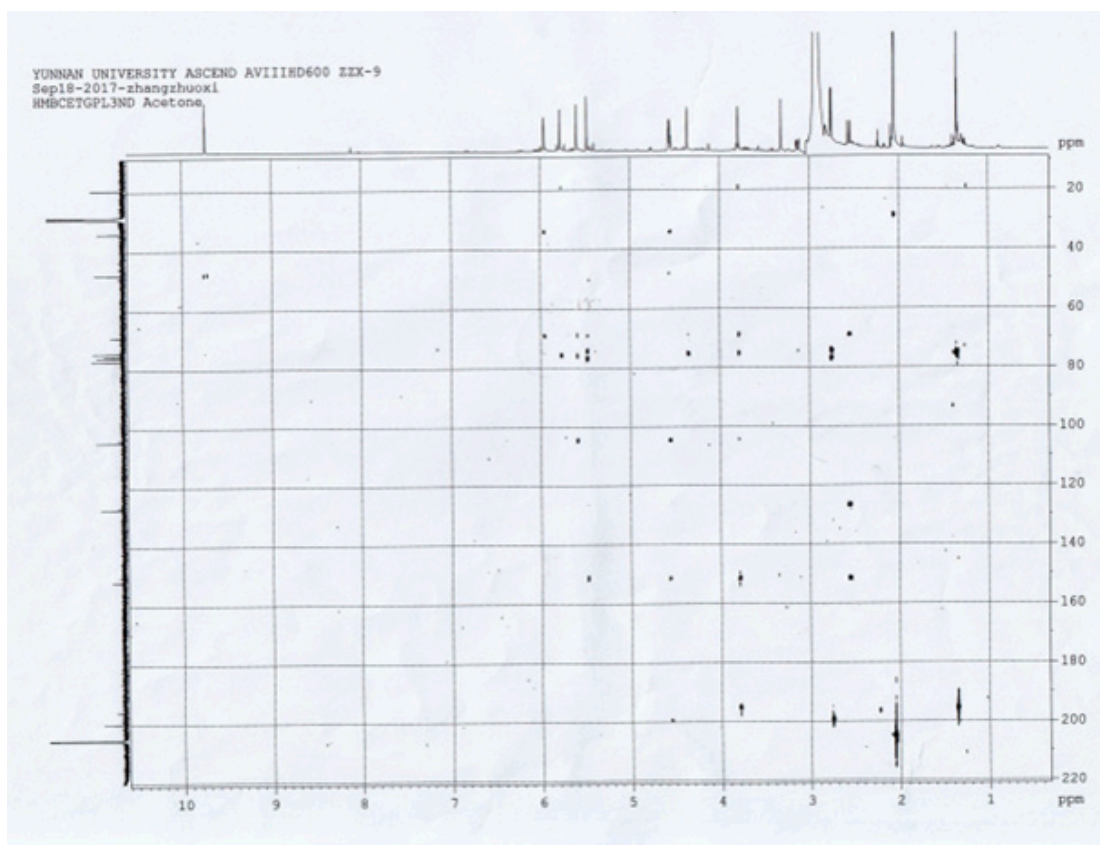

Figure S13. HMBC spectrum of compound **2** in acetone (600MHz)

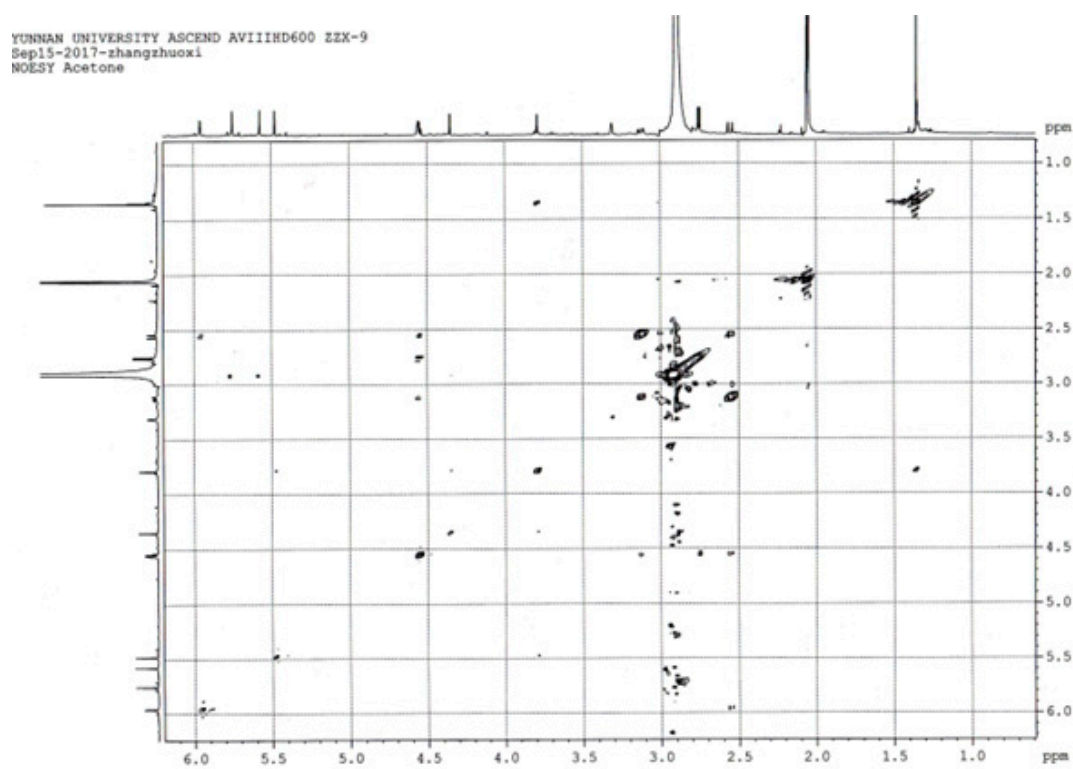

Figure S14. NOESY spectrum of compound **2** in acetone (600MHz)

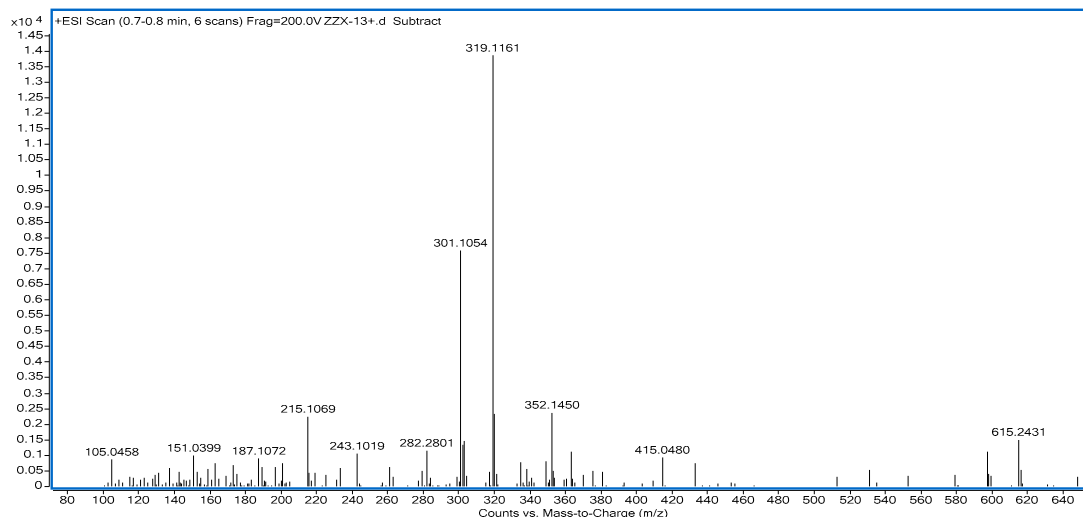

Figure S15.HRESIMS spectrum of compounds **3** and **4**

YUNNAN UNIVERSITY AVIIIND500 zzx-13  
Oct27-2017-zhangzhuoxi MeOD

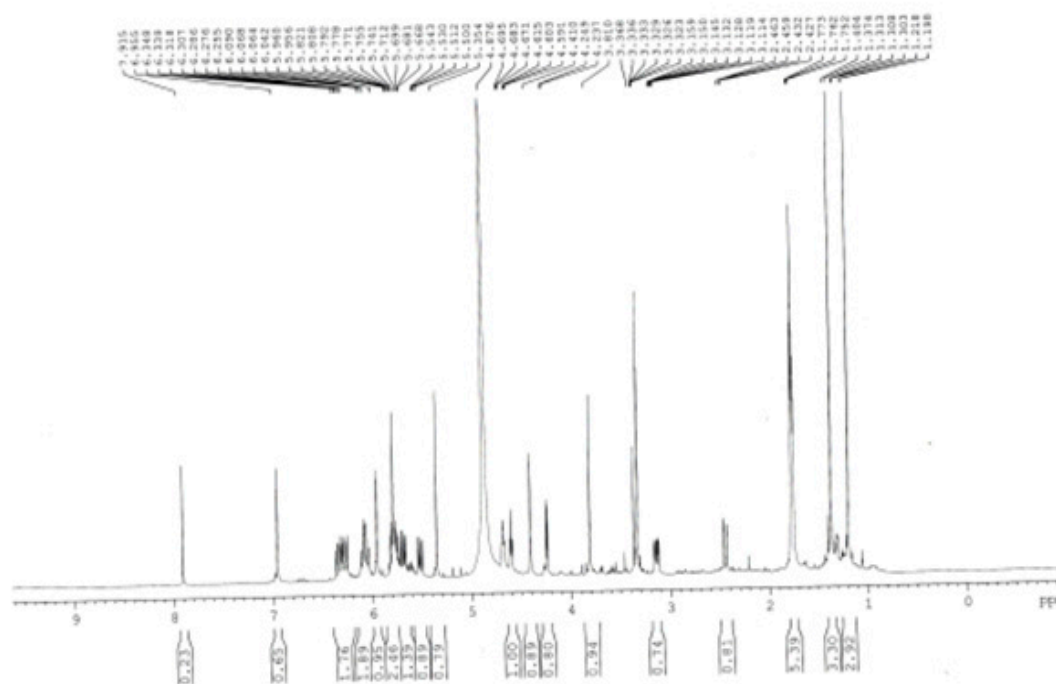

Figure S16.  $^1\text{H}$  NMR spectrum of compounds **3** and **4** in MeOD (500 MHz)

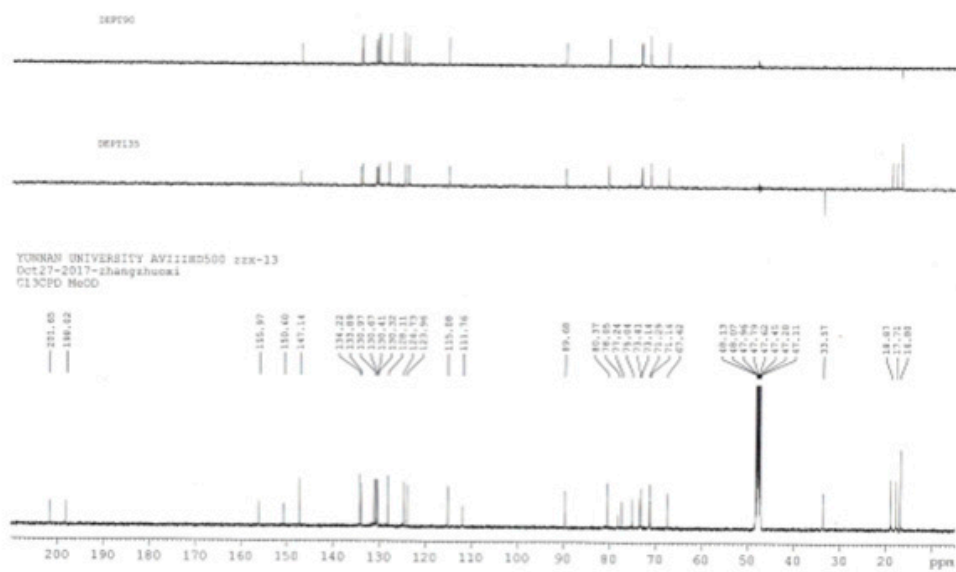

Figure S17.  $^{13}\text{C}$  NMR spectrum of compounds **3** and **4** in MeOD (125 MHz)

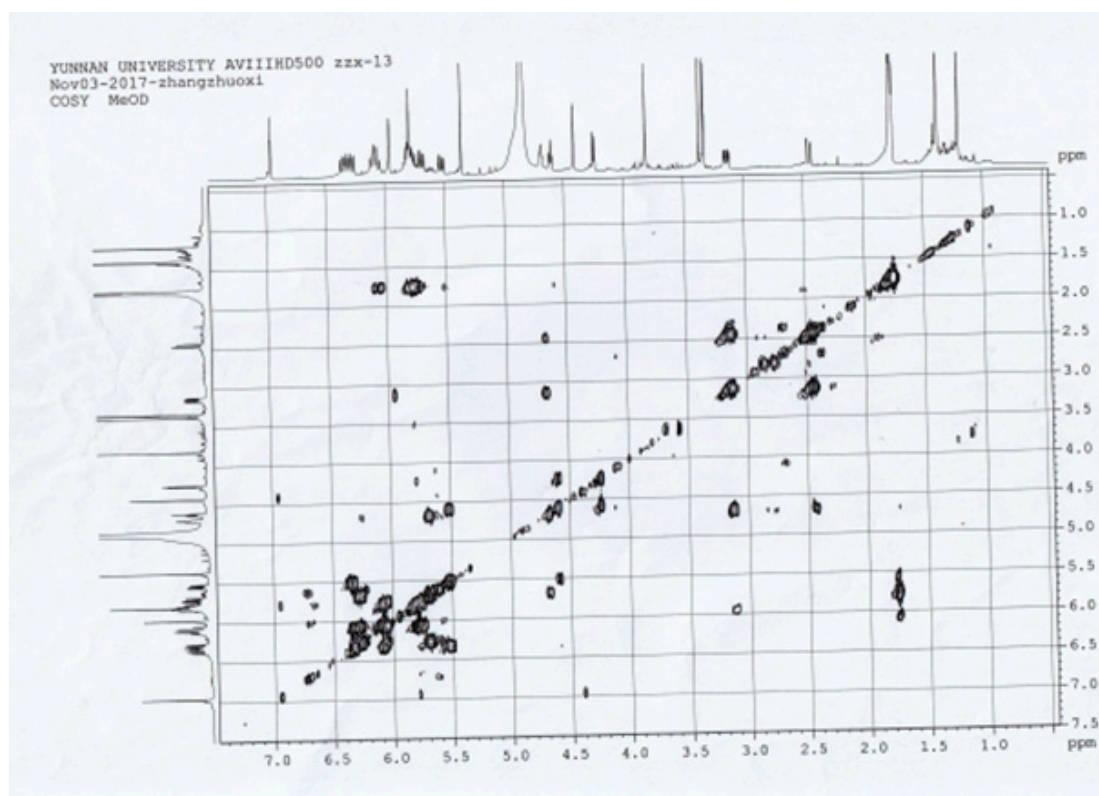

Figure S18. COSY spectrum of compounds **3** and **4** in MeOD (500MHz)

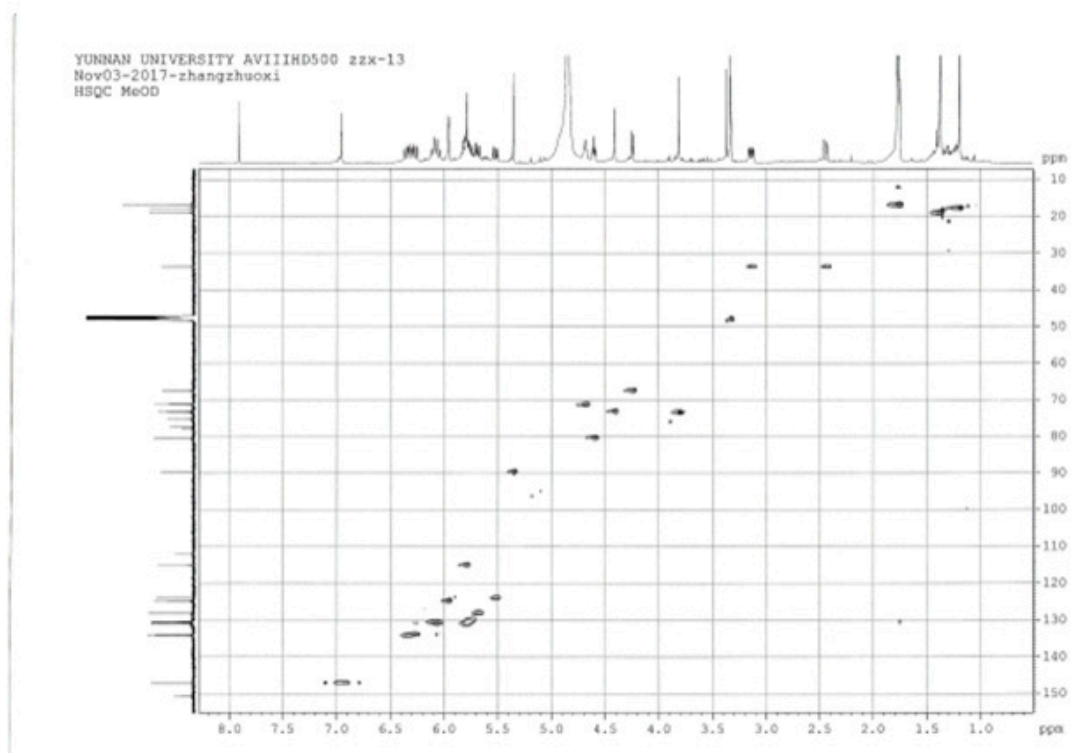

Figure S19. HSQC spectrum of compound **3** and **4** in MeOD (500MHz)

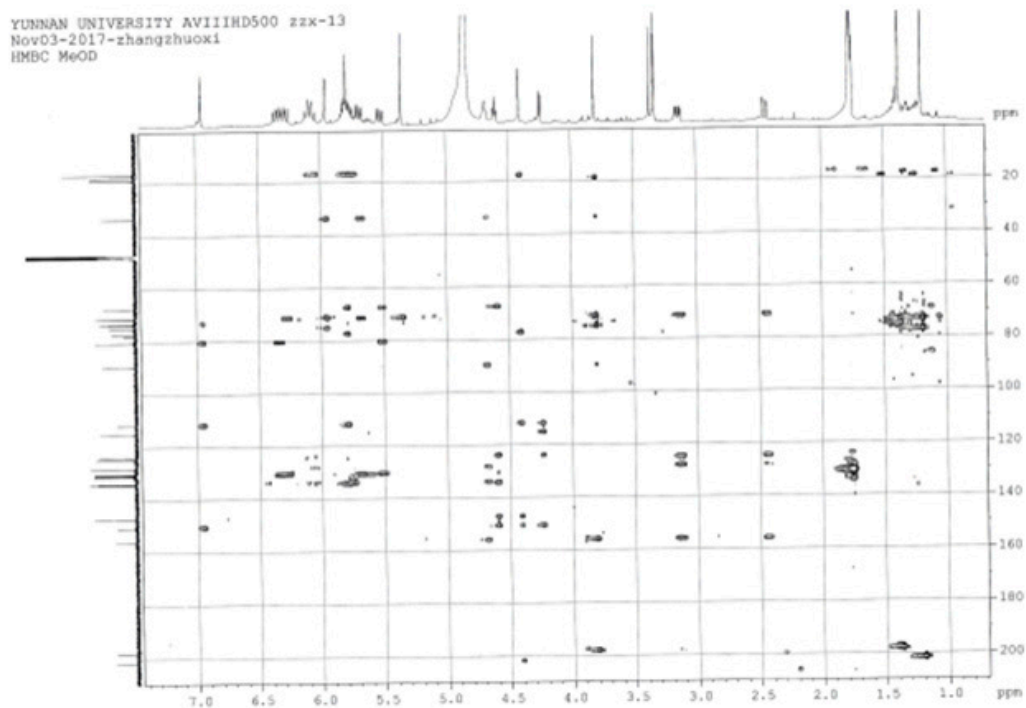

Figure S20. HMBC spectrum of compounds **3** and **4** in MeOD (500MHz)

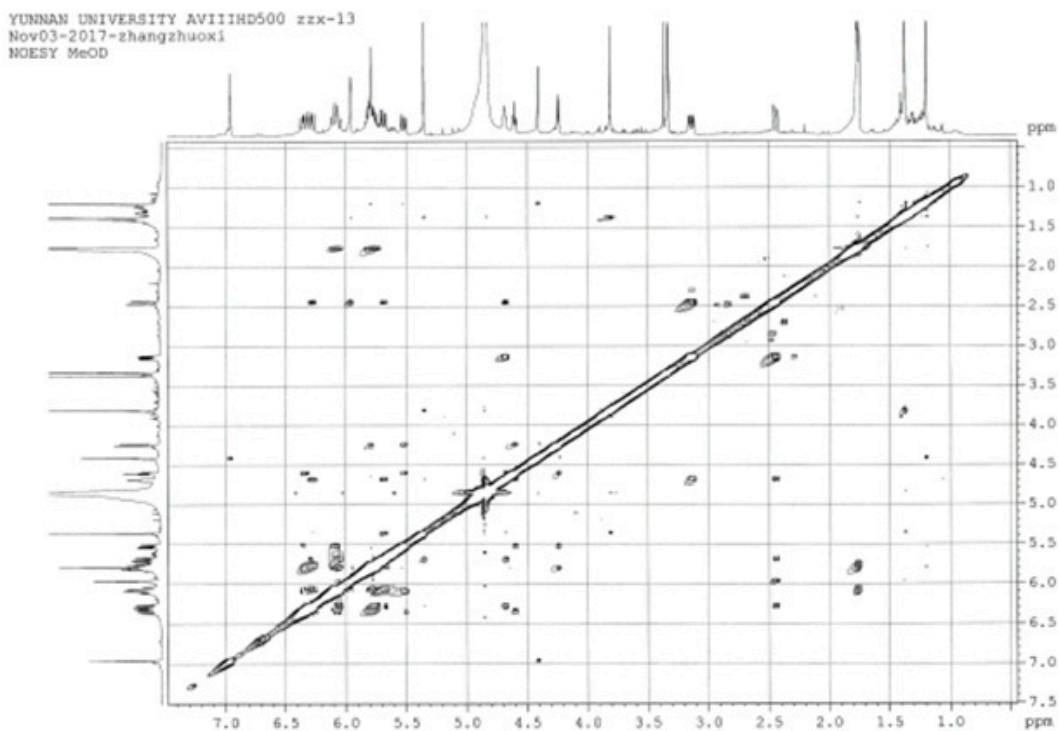

Figure S21. NOESY spectrum of compounds **3** and **4** in MeOD (500MHz)

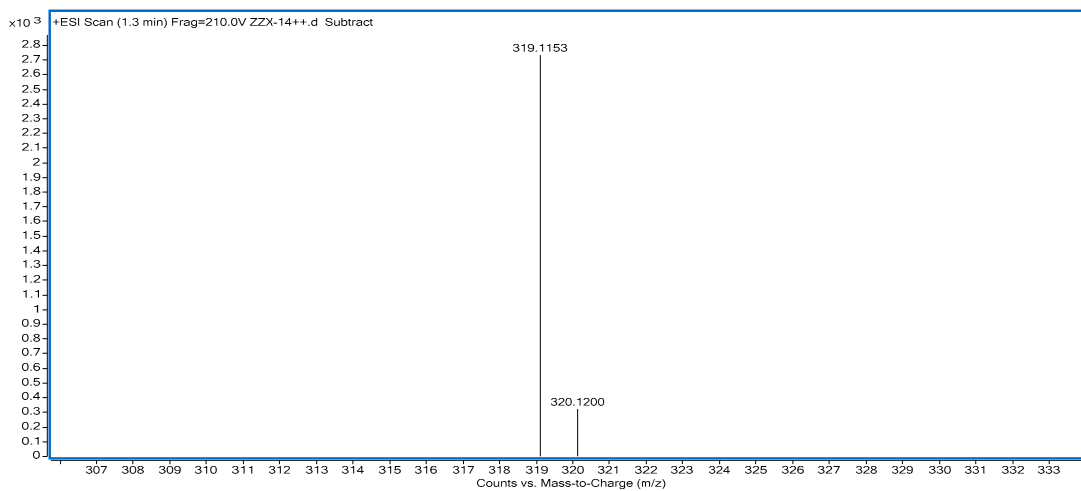

Figure S22.HRESIMS spectrum of compound **5**

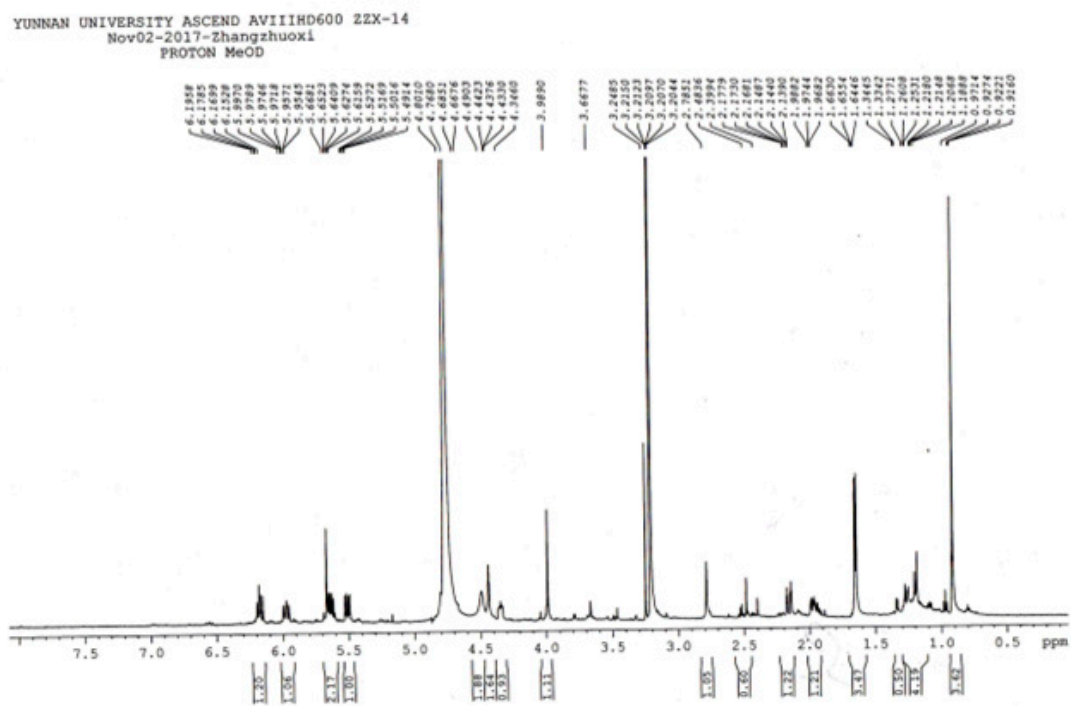

Figure S23.  $^1\text{H}$  NMR spectrum of compound **5** in MeOD (600 MHz)

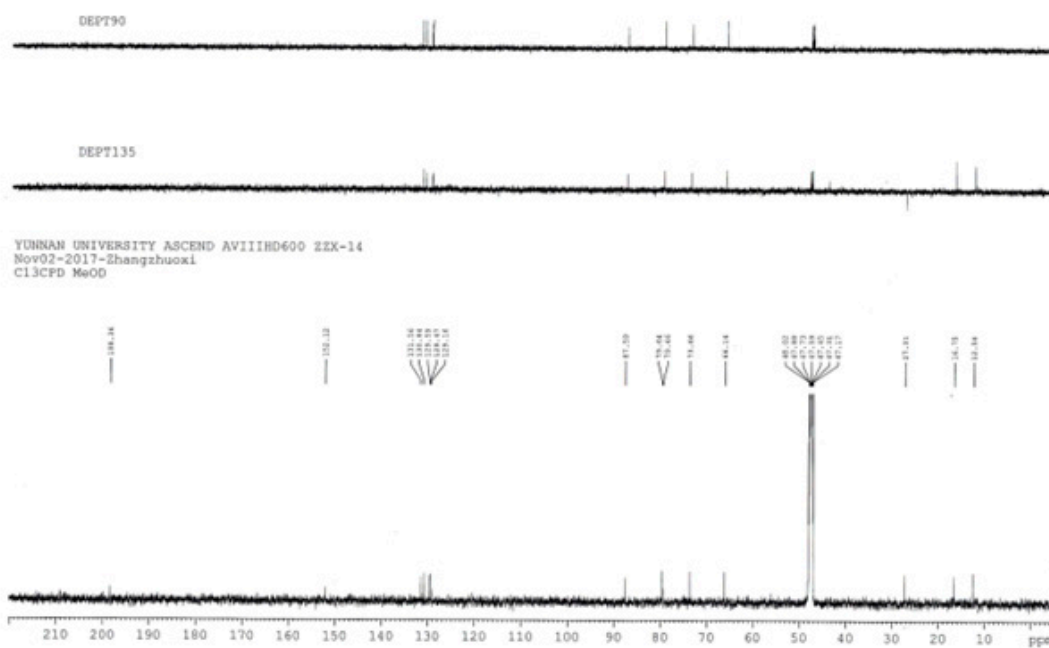

Figure S24.  $^{13}\text{C}$  NMR spectrum of compound **5** in MeOD (150MHz)

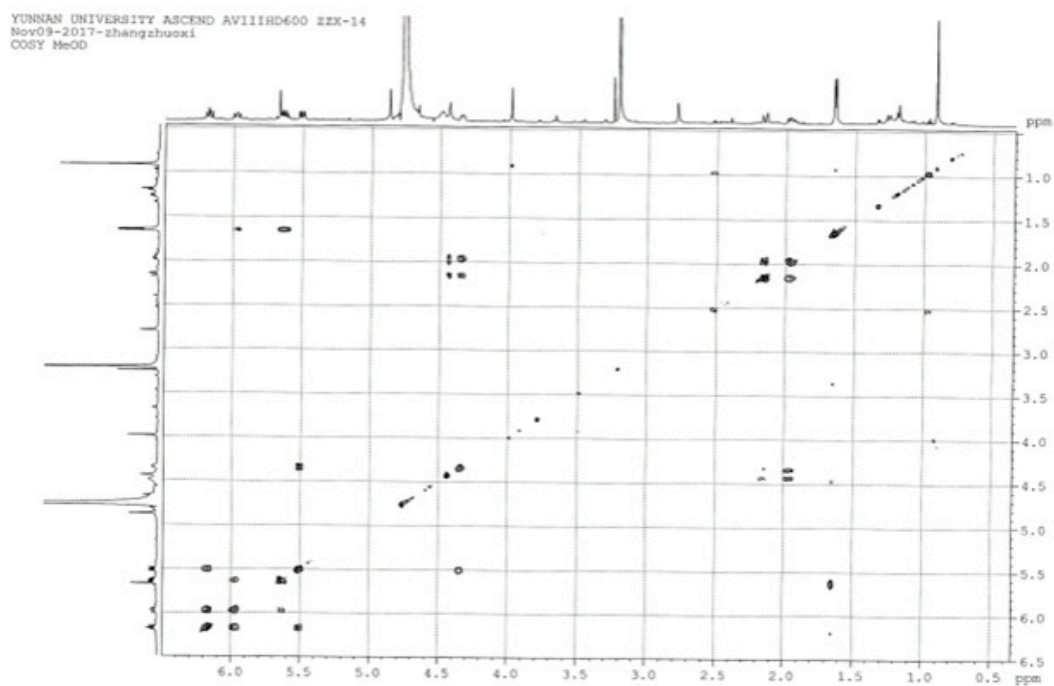

Figure S25. COSY spectrum of compound **5** in MeOD (600MHz)

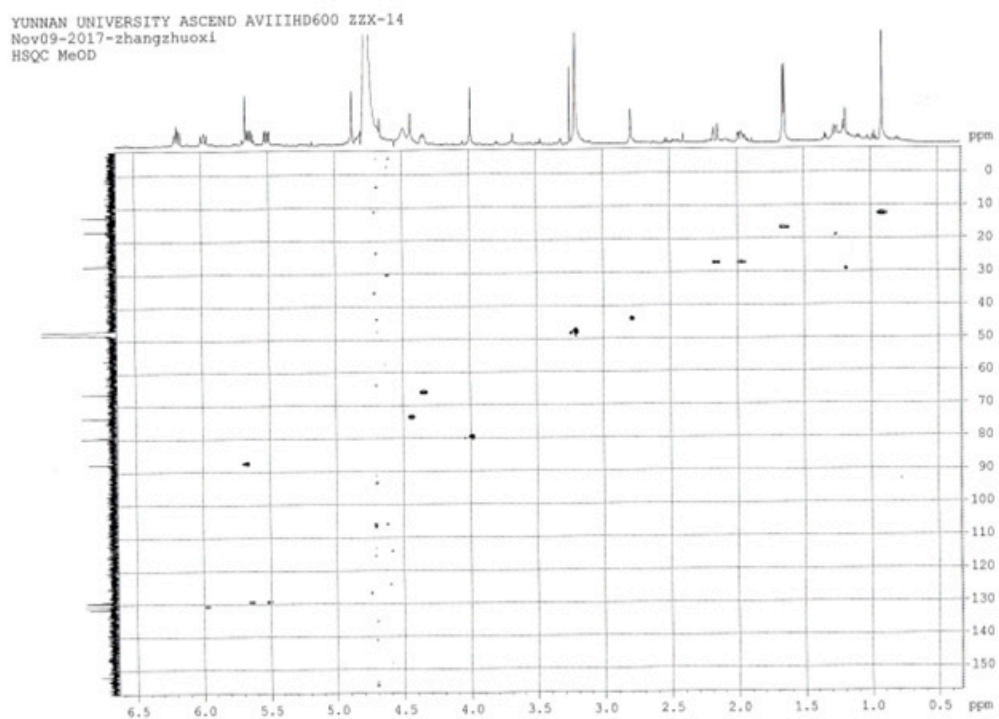

Figure S26. HSQC spectrum of compound **5** in MeOD (600MHz)

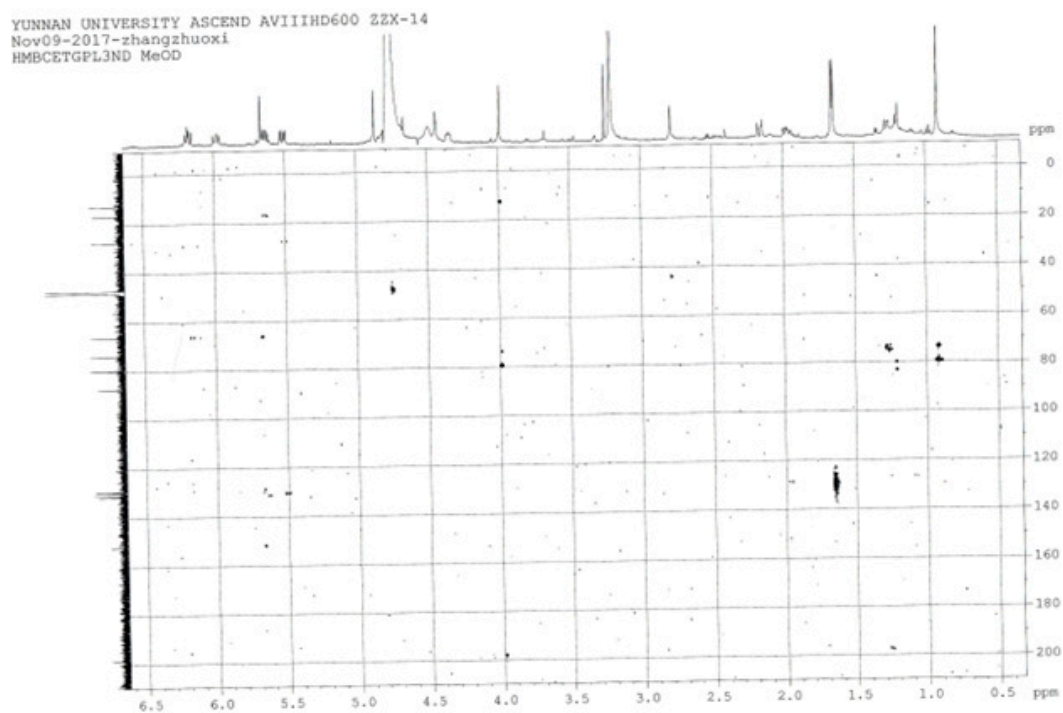

Figure S27. HMBC spectrum of compound **5** in MeOD (600MHz)

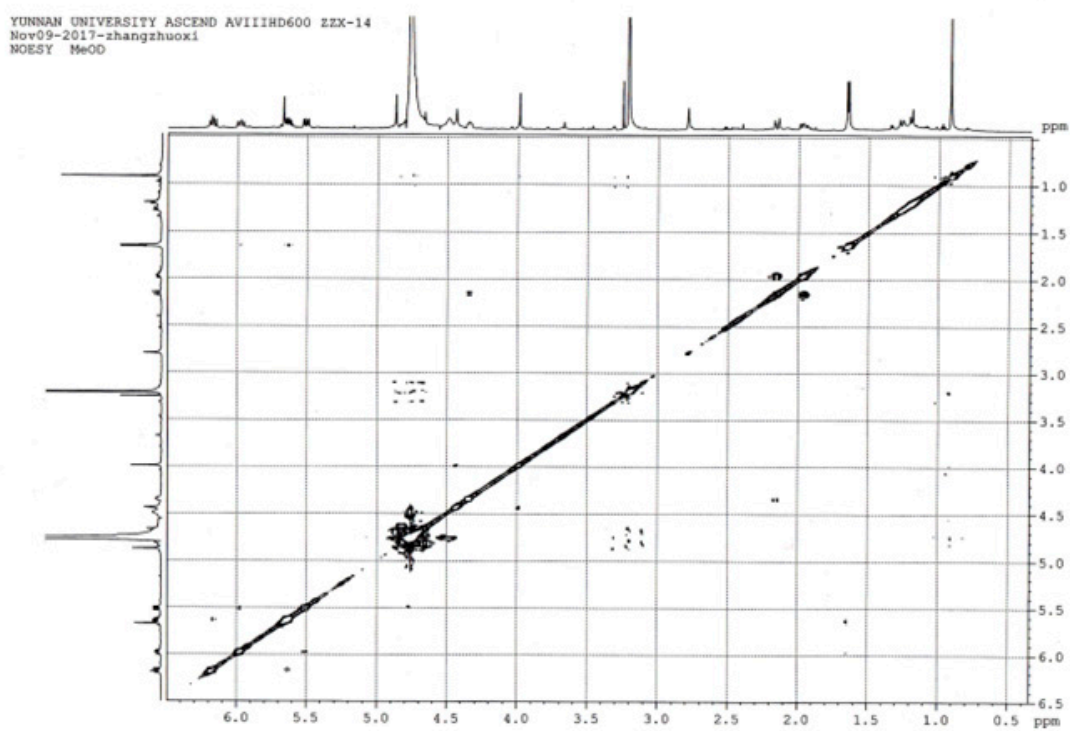

Figure S28. NOESY spectrum of compound **5** in MeOD (600MHz)



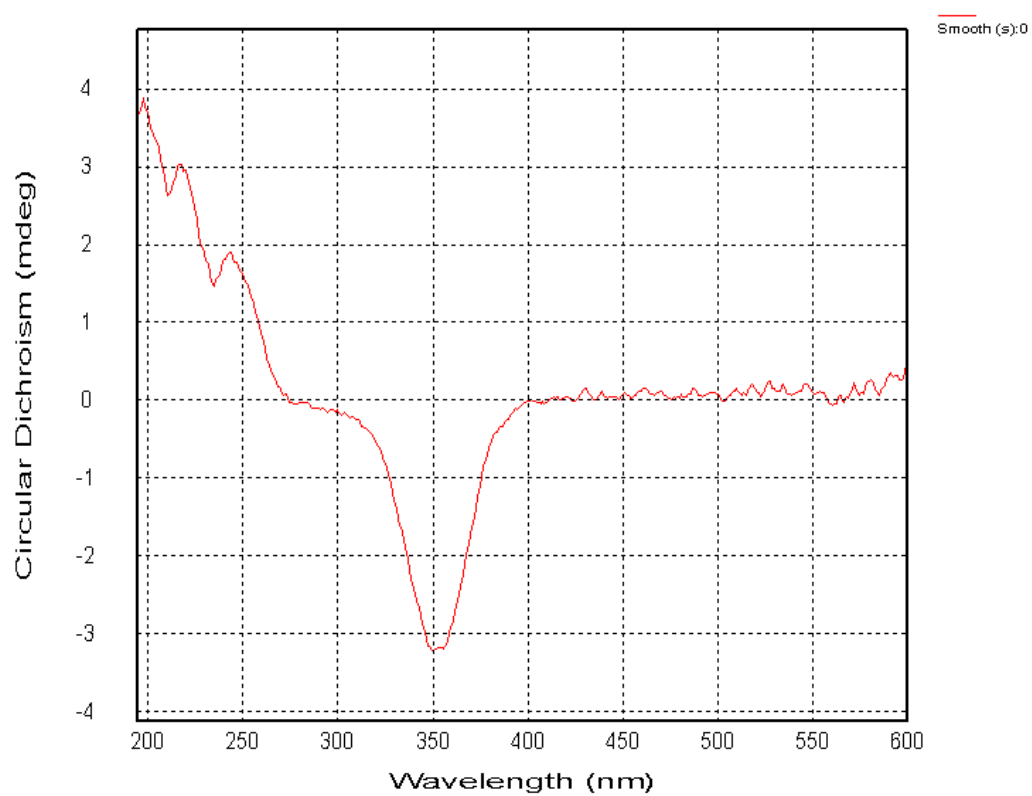

Figure S29. CD spectrum of compound 1

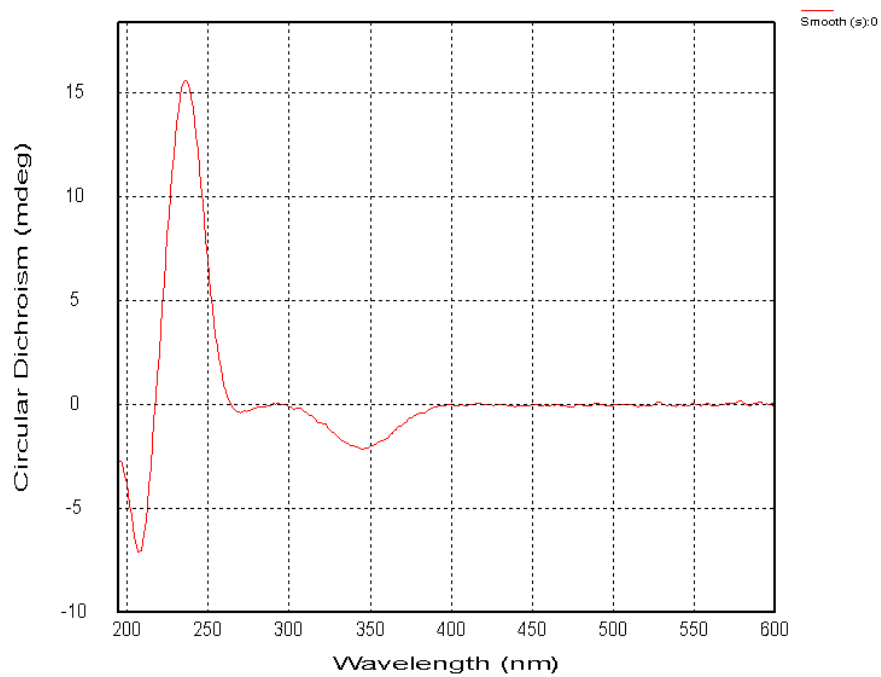

Figure S30. CD spectrum of compound 2

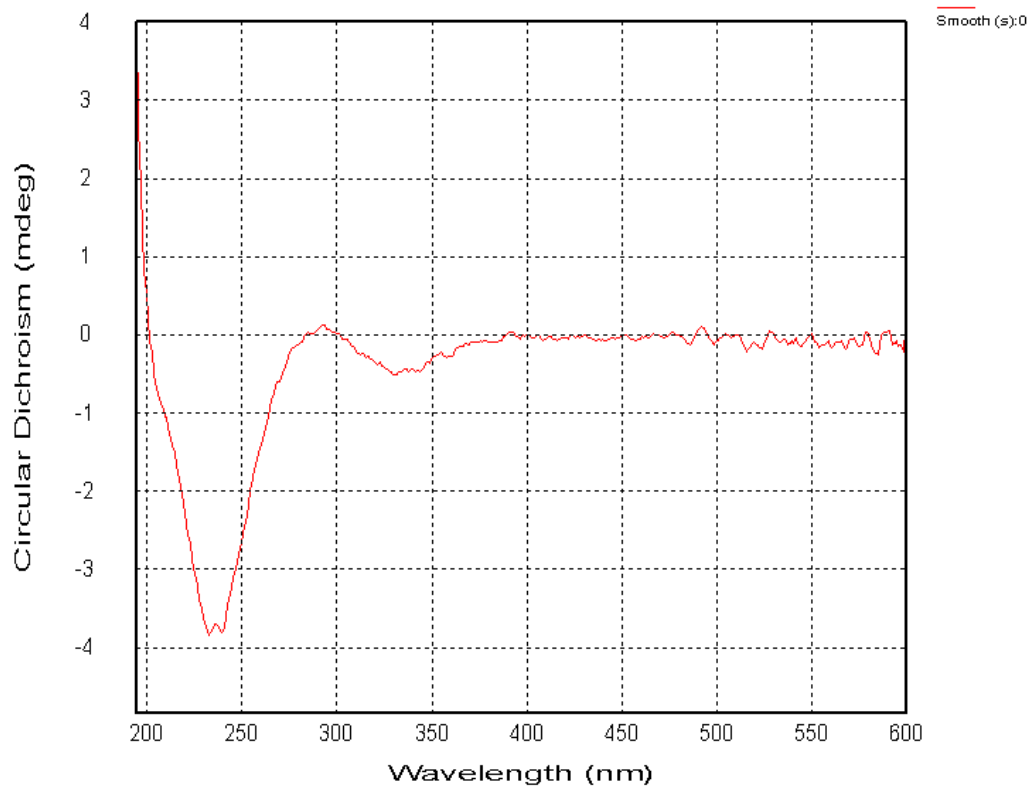

Figure S31. CD spectrum of compound 5

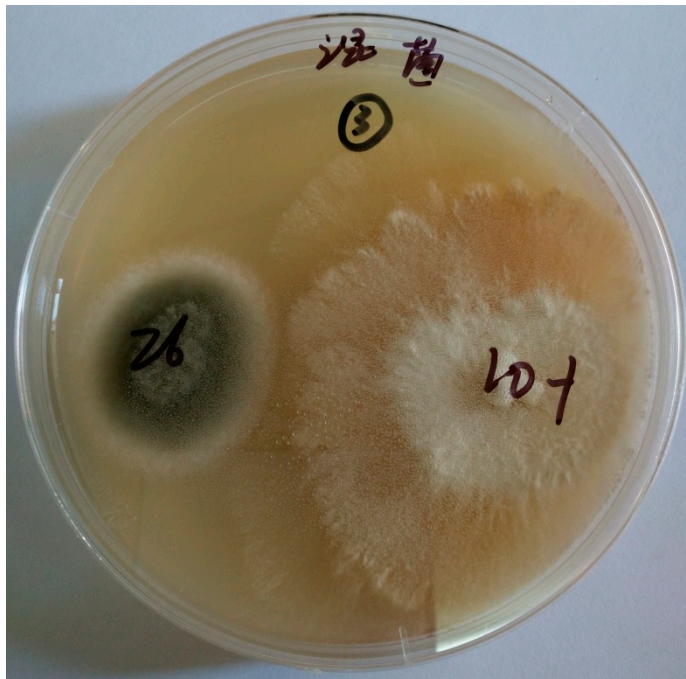

Figure S32. The plate culture of *Beauveria bassiana*, and *Nigrospora oryzae* in 3 days (Sequenced as the left to right).
